# Supplementary material
Source: ML conference proceedings conference paper supplement (https://openreview.net/forum?id=JavFPcsscd5)
Supplement: supplementary_material [file attachment]

---

# Supplementary Materials

---

## A Theoretical Relations Between Data-Augmentation, Generalization, and a Model's Bias and Robustness

### A.1 Data-Augmentation, Regularization and Structural Risk Minimization

**Bias-Variance Decomposition.** The expected error of a trained model can *always* be decomposed into two terms that can be tune by altering the considered model class and regularization, and a third term which is the inherent measurement noise, that can not be reduced. In fact, the true labels are obtained from  $\mathbf{y} = f(\mathbf{x}) + \epsilon$  with  $f$  the true, unknown, data model, and  $\epsilon$  some irreducible error i.e. coming from measurements or data compression. For the Mean-Squared Error (MSE) we obtain this decomposition as

$$\begin{aligned} \mathbb{E}_{\epsilon, \mathbf{X}, \mathbb{D}} \left[ \left( \mathbf{y} - \hat{f}(\mathbf{x}; \mathbb{D}) \right)^2 \right] &= \mathbb{E}_{\epsilon, \mathbf{X}, \mathbb{D}} \left[ \epsilon^2 + \epsilon \left( f(\mathbf{x}) - \hat{f}(\mathbf{x}; \mathbb{D}) \right) + \left( f(\mathbf{x}) - \hat{f}(\mathbf{x}; \mathbb{D}) \right)^2 \right] \\ &= \text{Var}(\epsilon)^2 + \mathbb{E}_{\mathbf{X}} \left[ \left( f(\mathbf{x}) - \mathbb{E}_{\mathbb{D}} \left[ \hat{f}(\mathbf{x}; \mathbb{D}) \right] \right)^2 - \mathbb{E}_{\mathbb{D}} \left[ \hat{f}(\mathbf{x}; \mathbb{D}) \right]^2 + \mathbb{E}_{\mathbb{D}} \left[ \hat{f}(\mathbf{x}; \mathbb{D})^2 \right] \right] \\ &= \text{Var}(\epsilon)^2 + \mathbb{E}_{\mathbf{X}} \left[ \underbrace{\left( f(\mathbf{x}) - \mathbb{E}_{\mathbb{D}} \left[ \hat{f}(\mathbf{x}; \mathbb{D}) \right] \right)^2}_{\text{bias}} + \underbrace{\text{Var}_{\mathbb{D}} \left( \hat{f}(\mathbf{x}; \mathbb{D}) \right)}_{\text{variance}} \right]. \end{aligned}$$

Although we only derive here the MSE case, the same can be obtained in the multivariate case and in classification settings [Valentini and Dietterich, 2004, Hastie et al., 2009]. When the model is with low complexity e.g. the model is under-parametrized, or the regularization is applied aggressively, the variance term becomes small and the bias term increases. Conversely, when the model is not regularized and is overparametrized, the variance term increases and the bias term reduces. One strategy to find the best model is offered by structural risk minimization.

**Structural Risk Minimization (SRM).** As introduced by Vapnik and Chervonenkis [1974], SRM proposes a search strategy to obtain the best model. One first chooses a class of function that  $\hat{f}$  must live in, hopefully informed from a priori knowledge e.g. polynomials of degree  $k$ , resnet50 DN architecture. Then, one finds a hierarchical construction of nested functional spaces that relate to the function complexity. For example, it could be considering polynomials of increasing degree, up to  $k$ , or considering resnet50s with weights being bounded by an increasing constant. Finally, one minimizes the empirical risk (training error) for each model and picks the one with best valid set performances. The valid set performance can be estimated empirically from a subset of the training set that has been set apart before fitting, or from other measures such as the VC-dimension of the trained model [Vapnik and Chervonenkis, 2015]. For example, cross-validating the weight decay parameter of a model corresponds to SRM. We make this connection precise below.

**From Data-Augmentation and Weight Decay to Nested Functional Spaces.** Regularization is commonly employed during training to prevent overfitting i.e. reduce the model complexity. One might argue that regularization does not *strictly* restrict the model functional space, it simply *favours* simpler models to be used. Yet, it turns out that regularization can be cast as explicitly restricting the parameter space of the model i.e. restricting the functional space of the model.

To see this, let's consider the following loss function to be minimized  $\ell(\theta, \gamma)$  that depends of the parameters  $\theta$  and the dataset  $\mathbf{D}$ . We define the following two optimization problems, one with Tikhonov regularization with amplitude  $\gamma$  and one with a constraint on the space of  $\theta$

$$\min_{\theta \in \mathbb{R}^K} \ell(\theta, \mathbf{D}) + \gamma \|\theta\|_2^2, \quad (P1)$$

$$\min_{\theta \in \mathbb{R}^K : \|\theta\|_2 \leq \beta} \ell(\theta, \mathbf{D}). \quad (P2)$$

Let's also denote by  $\hat{\theta}(\gamma)$  the parameter value that is a global minimum of (P1); if multiple global minimum exist, pick the one with greatest  $\ell_2$  norm. We now have to solve for  $\theta, \lambda$  the following system that results from the Lagrangian, with  $\lambda$  the Lagrange multiplier [Bertsekas, 2014] and  $s^2$  the slack variable of the inequality

$$\nabla_{\theta} \ell(\theta, \mathbf{D}) + 2\lambda\theta = 0 \text{ and } \|\theta\|_2^2 - \beta - s^2 = 0 \text{ and } 2\lambda s = 0,$$

setting  $\lambda \leftarrow \gamma$ ,  $\theta \leftarrow \hat{\theta}(\gamma)$ , and  $\beta \leftarrow \|\hat{\theta}(\gamma)\|_2^2$ ,  $s \leftarrow 0$  solves the system. As a result, solving the constrained optimization problem with  $\beta = \|\hat{\theta}(\gamma)\|_2^2$  and solving the Tikhonov regularized problem with  $\gamma$  coefficient is equivalent. Since we also have that  $\|\hat{\theta}(\gamma_1)\|_2^2 \leq \|\hat{\theta}(\gamma_2)\|_2^2$ , we obtain that starting from a high value of Tikhonov regularization and gradually reducing it produces nested functional spaces where the model live in. More general results can be obtained in different regularization settings in Kloft et al. [2009], Hastie et al. [2009]. Moving to the case of DA, the same procedure applies. In fact, one can use the results of Phaisangittisagul [2016], LeJeune et al. [2019], Balestrierio et al. [2022] to cast DAs such as dropout, and image perturbations as explicit regularizers à la Tikhonov and repeat the above procedure. In fact, DA can be seen as producing a model with lower variance and a bias towards the augmented dataset. Hence, **if the augmented dataset is not aligned with the true underlying data distribution, DA will increase the model's bias**. For results studying DA in the context of structural risk minimization, we refer the reader to Chapelle et al. [2000], Arjovsky et al. [2019], Chen et al. [2020a], Ilse et al. [2021]. In short, it is clear from the above that DA is yet another form of regularization that can be applied for structural risk minimization. Yet, even if DA effectively restrict the functional space of the model, it can be at the cost of producing strong biases, as we empirically observed in Section 3.

## A.2 Statistical Test

To further convey our claim, we now propose a formal statistical test [Neyman and Pearson, 1933, Fisher, 1955] on the hypothesis that the per-class accuracy is significantly lower when DA is applied for those classes. A test of significance is a formal procedure for comparing observed data with a claim or hypothesis. In our case we aim to test if the mean accuracy on class  $y$  of a model trained without DA is greater than the one obtained with DA. Due to the stochastic optimization process, this accuracy is a random variable even when the dataset is not changed. Hence we define that random variable by  $\text{Accu}_y(\mathbb{X})$  and our null hypothesis by  $H_0 = \mathbb{E}[\text{Accu}_y(\mathbb{X})] < \mathbb{E}[\text{Accu}_y(\mathbb{X}_{\text{DA}})]$  with  $\mathbb{X}$  the original dataset and  $\mathbb{X}_{\text{DA}}$  the DA dataset using random crop with  $\alpha \in [100, 8]$ . A one-sided t-test is used and the form that does not assume equal variances is known as Welch's t-test [Welch, 1947] with statistic  $t = \frac{\hat{\mu}(\mathbb{X}_1) - \hat{\mu}(\mathbb{X}_2)}{\sqrt{\hat{\sigma}^2(\mathbb{X}_1) + \hat{\sigma}^2(\mathbb{X}_2)}}$ , and with degrees of freedom  $\nu = \left( \frac{\hat{\sigma}^2(\mathbb{X}_1)}{N_1} + \frac{\hat{\sigma}^2(\mathbb{X}_2)}{N_2} \right)^2 \left( \frac{\hat{\sigma}^4(\mathbb{X}_1)}{N_1^2(N_2-1)} + \frac{\hat{\sigma}^4(\mathbb{X}_2)}{N_2^2(N_1-1)} \right)^{-1}$ . Note that one could formulate this problem in term of average treatment effect, where the treatment is the application of DA and the outcome is the accuracy on class  $y$  of the trained model. Doing so, one could measure the per-sample bias from the Conditional Treatment Effect, however we limit ourselves to a per-class study and leave such fine-grained analysis for future work.

## B Proof of Theorem 1

*Proof.* To streamline our derivations and without loss of generality, we first impose that  $\mathcal{T}_{-\alpha}$  inverts the action of  $\mathcal{T}_{\alpha}$ , that  $\mathcal{T}_0$  acts as the identity mapping and that  $\mathcal{T}_{\alpha} \circ \mathcal{T}_{\beta} = \mathcal{T}_{\alpha+\beta}$ . In short, we have a *group* structure that allows us to define the following equivalence class  $\sim$  that is positive iff two images are related by a transformation, formally defined as

$$\mathbf{u} \sim \mathbf{v} \iff \exists \alpha : \mathcal{T}_{\alpha}(\mathbf{u}) = \mathbf{v}, \quad (2)$$

which is *reflexive* ( $\mathbf{u} \sim \mathbf{u}$  with  $\alpha = 0$ ), *symmetric* ( $\mathbf{u} \sim \mathbf{v}$  with  $\alpha$  implies that  $\mathbf{v} \sim \mathbf{u}$  with  $-\alpha$ ), and *transitive* ( $\mathbf{u} \sim \mathbf{v}$  with  $\alpha$  and  $\mathbf{v} \sim \mathbf{w}$  with  $\beta$  implies that  $\mathbf{u} \sim \mathbf{w}$  with  $\alpha + \beta$ ).

Lastly, given a set of samples  $\mathbb{X}$ , we define the following  $g$  mapping that will decompose  $\mathbb{X}$  into a set of generators/prototypes  $\mu_1, \mu_2, \dots$  and corresponding DA parameters sets  $\mathbb{A}_1, \mathbb{A}_2, \dots$  so that when applying all the DA parameters from  $\mathbb{A}_i$  to  $\mu_i$ , and going that for all  $i$  recover exactly  $\mathbb{X}$ . We define those formally as

$$g(\mathbb{X}) \mapsto \{(\mu_1, \mathbb{A}_1), (\mu_2, \mathbb{A}_2), \dots\} \text{ s.t. } \cup_{(\mu, \mathbb{A}) \in g(\mathbb{X})} \{\mathcal{T}_{\alpha}(\mu), \forall \alpha \in \mathbb{A}\} = \mathbb{X}. \quad (3)$$

Note that there is a bijection between the pairs given by  $g(\mathbb{X})$  and the set of equivalent samples defined by  $\mathbb{X}/\sim$ . Using this, we obtain the following decomposition of the empirical error

$$\mathcal{L} = \mathbb{E}_{\mathbf{x}} [\|f^*(\mathbf{x}) - f_{\theta}(\mathbf{x})\|] = \sum_{(\mu, \mathbb{A}) \in g(\mathbb{X})} \sum_{\alpha \in \mathbb{A}} \|f^*(\mathcal{T}_{\alpha}(\mu)) - f_{\theta}(\mathcal{T}_{\alpha}(\mu))\| p(\mathcal{T}_{\alpha}(\mu)).$$

Given the above, we now simply split a dataset  $\mathbb{X}$  into two, one that contains training samples, and one that contains everything else. Without loss of generality we assume that  $p(\mathcal{T}_{\alpha}(\mu))$  is a constant  $\kappa$  i.e. that the distribution of samples is uniform on the data manifold. If not, the below result still holds as long as the incorrect DA occurs for samples with nonzero probability of occurring. Using the fact that the model has 0 training error, we obtain that the approximation error between  $f^*$  and  $f_{\theta}$  can not be 0 unless the DA is perfectly aligned with the level-sets of  $f^*$  as in

$$\begin{aligned} \frac{\mathcal{L}}{\kappa} &= \sum_{(\mu, \mathbb{A}) \in g(\mathbb{X} \setminus \mathbb{X}_{\text{train}})} \sum_{\alpha \in \mathbb{A}} \|f^*(\mathcal{T}_{\alpha}(\mu)) - f_{\theta}(\mathcal{T}_{\alpha}(\mu))\|_2^2 + \sum_{(\mu, \mathbb{A}) \in g(\mathbb{X}_{\text{train}})} \sum_{\alpha \in \mathbb{A}} \|f^*(\mathcal{T}_{\alpha}(\mu)) - f_{\theta}(\mathcal{T}_{\alpha}(\mu))\|_2^2 \\ &\geq \sum_{(\mu, \mathbb{A}) \in g(\mathbb{X}_{\text{train}})} \sum_{\alpha \in \mathbb{A}} \|f^*(\mathcal{T}_{\alpha}(\mu)) - f_{\theta}(\mathcal{T}_{\alpha}(\mu))\|_2^2 \\ &\geq \sum_{(\mu, \mathbb{A}) \in g(\mathbb{X}_{\text{train}})} \sum_{\alpha \in \mathbb{A}} \|f^*(\mathcal{T}_{\alpha}(\mu)) - \text{const}\|_2^2 \quad (\text{since zero training error for } f_{\theta}), \\ &> 0 \end{aligned}$$

where the second to last equality assumes that the model has 0 training error, and will thus predict the same constant for all DA version of the same sample. The last step follows if the DA does not respect the true level-sets of the true function  $f^*$ .  $\square$

## C Additional Figures

## D Resnet50 Per-Class Accuracy Difference (with - without random crop)

| class            | top1 diff. |
|------------------|------------|------------------|------------|------------------|------------|------------------|------------|------------------|------------|
| academic gown    | -19.88     | barn spider      | -19.57     | sunglass         | -10.97     | Windsor tie      | -10.22     | overskirt        | -10.17     |
| tailed frog      | -9.9       | assault rifle    | -9.73      | chain            | -8.23      | velvet           | -8.12      | tobacco shop     | -7.31      |
| consomme         | -7.26      | seashore         | -6.88      | screen           | -6.71      | monastery        | -6.58      | strawberry       | -6.54      |
| quilt            | -6.53      | wool             | -6.24      | green mamba      | -5.39      | bulletproof vest | -5.3       | lemon            | -5.25      |
| English foxhound | -5.15      | French loaf      | -5.15      | vault            | -5.05      | chain mail       | -4.97      | redbone          | -4.86      |
| polecat          | -4.83      | terrapin         | -4.8       | pomegranate      | -4.73      | mailliot         | -4.53      | black-and-tan co | -4.34      |
| sidewinder       | -4.2       | titi             | -3.56      | bighorn          | -3.52      | suit             | -3.51      | breastplate      | -3.42      |
| beaker           | -3.37      | rock python      | -3.33      | Siberian husky   | -3.31      | standard schnauz | -3.23      | rock beauty      | -3.18      |
| cliff            | -2.99      | Walker hound     | -2.81      | spaghetti squash | -2.75      | collie           | -2.6       | frying pan       | -2.55      |
| pier             | -2.52      | slide rule       | -2.46      | theater curtain  | -2.4       | rule             | -2.29      | cassette player  | -2.27      |
| komondor         | -2.26      | acoustic guitar  | -2.17      | prairie chicken  | -2.14      | plate rack       | -2.07      | ear              | -2.06      |
| shoji            | -2.05      | wire-haired fox  | -1.9       | mailliot         | -1.89      | long-horned beet | -1.83      | Sussex spaniel   | -1.81      |
| Sealyham terrier | -1.64      | sax              | -1.62      | honeycomb        | -1.58      | Japanese spaniel | -1.51      | grey whale       | -1.49      |
| cucumber         | -1.47      | alp              | -1.46      | envelope         | -1.28      | whiptail         | -1.27      | otterhound       | -1.24      |
| tiger cat        | -1.23      | affenpinscher    | -1.15      | fox squirrel     | -1.13      | barrel           | -1.05      | gazelle          | -1.01      |
| zebra            | -0.95      | red-breasted mer | -0.9       | indri            | -0.9       | hen-of-the-woods | -0.88      | lipstick         | -0.86      |
| tile roof        | -0.84      | lorikeet         | -0.63      | viaduct          | -0.52      | chocolate sauce  | -0.47      | prayer rug       | -0.38      |
| passenger car    | -0.37      | Weimaraner       | -0.35      | daisy            | -0.32      | potpie           | -0.31      | loudspeaker      | -0.31      |
| horned viper     | -0.29      | peacock          | -0.29      | red fox          | -0.27      | porcupine        | -0.22      | red wine         | -0.21      |
| monarch          | -0.21      | window shade     | -0.21      | patas            | -0.2       | golf ball        | -0.16      | trench coat      | -0.15      |
| valley           | -0.11      | hand-held comput | -0.11      | chiffonier       | -0.01      | yellow lady's sl | 0          | Norwich terrier  | 0.02       |
| chow             | 0.04       | palace           | 0.1        | sea anemone      | 0.1        | lakeside         | 0.12       | jay              | 0.12       |
| eggnog           | 0.12       | freight car      | 0.14       | great grey owl   | 0.16       | trombone         | 0.18       | redshank         | 0.19       |
| ox               | 0.2        | sloth bear       | 0.21       | mink             | 0.21       | vine snake       | 0.23       | pelican          | 0.24       |
| Appenzeller      | 0.24       | little blue hero | 0.29       | jackfruit        | 0.31       | leatherback turt | 0.32       | eft              | 0.34       |
| Dandie Dinmont   | 0.38       | damsel           | 0.41       | yawl             | 0.53       | thresher         | 0.57       | ground beetle    | 0.57       |
| black stork      | 0.63       | magpie           | 0.65       | notebook         | 0.66       | spatula          | 0.68       | Loafer           | 0.7        |
| hartebeest       | 0.71       | white wolf       | 0.71       | king penguin     | 0.72       | steel arch bridg | 0.76       | jacamar          | 0.8        |
| stopwatch        | 0.82       | Band Aid         | 0.86       | car wheel        | 0.87       | stone wall       | 0.94       | black grouse     | 1.03       |
| spider web       | 1.06       | Saluki           | 1.06       | school bus       | 1.1        | hog              | 1.1        | dugong           | 1.11       |
| container ship   | 1.12       | lumbermill       | 1.14       | bannister        | 1.15       | kuvasz           | 1.15       | giant panda      | 1.16       |
| broccoli         | 1.17       | Bouvier des Flan | 1.18       | Norwegian elkhou | 1.25       | lifeboat         | 1.28       | spiny lobster    | 1.28       |
| water ouzel      | 1.31       | pajama           | 1.33       | abacus           | 1.34       | typewriter keybo | 1.37       | indigo bunting   | 1.4        |
| tabby            | 1.42       | sleeping bag     | 1.42       | groenendael      | 1.43       | digital clock    | 1.44       | beaver           | 1.48       |
| quill            | 1.49       | isopod           | 1.51       | papillon         | 1.51       | snowmobile       | 1.51       | American lobster | 1.52       |
| pick             | 1.54       | sunscreen        | 1.6        | window screen    | 1.6        | armadillo        | 1.6        | Blenheim spaniel | 1.61       |
| bittern          | 1.64       | gar              | 1.65       | drumstick        | 1.65       | bald eagle       | 1.65       | night snake      | 1.7        |
| European gallinu | 1.7        | agaric           | 1.74       | comic book       | 1.75       | revolver         | 1.86       | brambling        | 1.87       |
| rapeseed         | 1.87       | Tibetan mastiff  | 1.9        | scoreboard       | 1.9        | nematode         | 1.91       | cauliflower      | 1.91       |
| flamingo         | 1.92       | cocktail shaker  | 1.92       | proboscis monkey | 1.94       | wood rabbit      | 1.94       | grille           | 1.95       |
| Afghan hound     | 1.98       | muzzle           | 1.98       | Samoyed          | 1.98       | ostrich          | 2          | abaya            | 2.03       |

| class            | top1 diff. |
|------------------|------------|------------------|------------|------------------|------------|------------------|------------|------------------|------------|
| earthstar        | 2.04       | bee eater        | 2.05       | frilled lizard   | 2.07       | pole             | 2.07       | slot             | 2.09       |
| barometer        | 2.1        | harp             | 2.11       | butternut squash | 2.12       | siamang          | 2.12       | screwdriver      | 2.15       |
| flat-coated retr | 2.15       | goldfish         | 2.17       | tape player      | 2.23       | lampshade        | 2.23       | jaguar           | 2.25       |
| flatworm         | 2.27       | meat loaf        | 2.29       | Model T          | 2.3        | harvestman       | 2.3        | electric ray     | 2.31       |
| dial telephone   | 2.32       | Pomeranian       | 2.33       | solar dish       | 2.36       | cassette         | 2.36       | cardoon          | 2.37       |
| neck brace       | 2.37       | Komodo dragon    | 2.41       | orange           | 2.44       | weasel           | 2.44       | oxygen mask      | 2.45       |
| black swan       | 2.45       | cabbage butterfl | 2.45       | albatross        | 2.46       | trailer truck    | 2.55       | crane            | 2.55       |
| Irish setter     | 2.57       | Leonberg         | 2.6        | sports car       | 2.62       | worm fence       | 2.63       | paddle           | 2.63       |
| bell pepper      | 2.64       | studio couch     | 2.65       | mountain bike    | 2.67       | running shoe     | 2.69       | brassiere        | 2.7        |
| coucal           | 2.7        | parachute        | 2.71       | grey fox         | 2.73       | streetcar        | 2.77       | toy terrier      | 2.77       |
| guenon           | 2.8        | space heater     | 2.81       | limpkin          | 2.82       | platypus         | 2.83       | ballplayer       | 2.83       |
| tiger shark      | 2.83       | sulphur butterfl | 2.86       | gyromitra        | 2.88       | American egret   | 2.9        | Scotch terrier   | 2.94       |
| Ibizan hound     | 2.94       | Persian cat      | 2.96       | Irish water span | 2.99       | Yorkshire terrie | 3.02       | Mexican hairless | 3.02       |
| bee              | 3.04       | mixing bowl      | 3.06       | ant              | 3.07       | white stork      | 3.1        | bell cote        | 3.11       |
| jack-o'-lantern  | 3.12       | swimming trunks  | 3.14       | odometer         | 3.16       | broom            | 3.17       | brain coral      | 3.17       |
| speedboat        | 3.22       | lacewing         | 3.24       | limousine        | 3.26       | king crab        | 3.28       | head cabbage     | 3.28       |
| Tibetan terrier  | 3.29       | wild boar        | 3.29       | walking stick    | 3.3        | grasshopper      | 3.3        | French horn      | 3.3        |
| lesser panda     | 3.31       | clumber          | 3.34       | dough            | 3.37       | African grey     | 3.39       | partridge        | 3.43       |
| Newfoundland     | 3.43       | bath towel       | 3.44       | plane            | 3.44       | whiskey jug      | 3.45       | vulture          | 3.45       |
| American coot    | 3.46       | radiator         | 3.48       | goldfinch        | 3.49       | bloodhound       | 3.5        | dalmatian        | 3.5        |
| robin            | 3.52       | ping-pong ball   | 3.53       | liner            | 3.57       | combination lock | 3.57       | barbell          | 3.63       |
| hay              | 3.63       | Rottweiler       | 3.65       | water tower      | 3.67       | dingo            | 3.68       | centipede        | 3.68       |
| Irish terrier    | 3.68       | bullet train     | 3.68       | Norfolk terrier  | 3.68       | remote control   | 3.7        | drilling platfor | 3.7        |
| green lizard     | 3.73       | ballpoint        | 3.73       | letter opener    | 3.74       | macaw            | 3.74       | totem pole       | 3.76       |
| sombrero         | 3.79       | dhole            | 3.79       | barracouta       | 3.8        | Arctic fox       | 3.82       | Airedale         | 3.83       |
| junco            | 3.83       | Saint Bernard    | 3.85       | vestment         | 3.86       | keeshond         | 3.87       | paper towel      | 3.87       |
| axolotl          | 3.88       | Old English shee | 3.89       | potter's wheel   | 3.9        | curly-coated ret | 3.9        | scabbard         | 3.94       |
| bassoon          | 3.96       | hook             | 3.98       | Boston bull      | 4          | borzoi           | 4          | African elephant | 4.01       |
| African hunting  | 4.03       | skunk            | 4.04       | three-toed sloth | 4.06       | Shih-Tzu         | 4.07       | Gila monster     | 4.08       |
| crossword puzzle | 4.1        | coral fungus     | 4.1        | cliff dwelling   | 4.12       | African crocodil | 4.13       | organ            | 4.14       |
| bustard          | 4.15       | projectile       | 4.17       | fire screen      | 4.18       | Pekinese         | 4.19       | hippopotamus     | 4.19       |
| mousetrap        | 4.22       | EntleBucher      | 4.26       | rock crab        | 4.27       | Bernese mountain | 4.28       | corn             | 4.3        |
| sock             | 4.32       | pineapple        | 4.32       | lionfish         | 4.34       | volcano          | 4.37       | stinkhorn        | 4.39       |
| German shepherd  | 4.39       | sorrel           | 4.4        | echidna          | 4.4        | folding chair    | 4.4        | snow leopard     | 4.41       |
| brown bear       | 4.45       | orangutan        | 4.46       | racer            | 4.47       | Kerry blue terri | 4.48       | Indian elephant  | 4.53       |
| West Highland wh | 4.56       | cougar           | 4.6        | Bedlington terri | 4.62       | carbonara        | 4.62       | spoonbill        | 4.62       |
| Eskimo dog       | 4.64       | zucchini         | 4.65       | balloon          | 4.65       | Welsh springer s | 4.67       | hummingbird      | 4.72       |
| Indian cobra     | 4.72       | photocopier      | 4.73       | cloak            | 4.76       | apiary           | 4.76       | trolleybus       | 4.77       |
| artichoke        | 4.78       | library          | 4.78       | hourglass        | 4.79       | airliner         | 4.82       | megalith         | 4.83       |
| spotlight        | 4.84       | minibus          | 4.85       | laptop           | 4.88       | Petri dish       | 4.93       | puck             | 4.95       |
| common newt      | 4.95       | house finch      | 4.97       | ringlet          | 4.97       | coffee mug       | 4.98       | sundial          | 5.01       |
| gondola          | 5.02       | Chihuahua        | 5.04       | moving van       | 5.06       | shopping cart    | 5.09       | sulphur-crested  | 5.09       |
| knot             | 5.09       | trifle           | 5.11       | trimaran         | 5.13       | dishrag          | 5.17       | Australian terri | 5.17       |
| malamute         | 5.19       | Chesapeake Bay r | 5.22       | drake            | 5.23       | whippet          | 5.24       | missile          | 5.24       |
| leopard          | 5.24       | European fire sa | 5.26       | screw            | 5.27       | airship          | 5.3        | leaf beetle      | 5.31       |
| briard           | 5.33       | computer keyboar | 5.36       | tiger            | 5.36       | miniskirt        | 5.37       | Maltese dog      | 5.38       |
| cuirass          | 5.39       | sturgeon         | 5.41       | tub              | 5.42       | loupe            | 5.42       | ibex             | 5.43       |
| trilobite        | 5.45       | kelpie           | 5.46       | bathing cap      | 5.46       | bottlecap        | 5.47       | toy poodle       | 5.5        |
| ambulance        | 5.5        | Great Dane       | 5.51       | rifle            | 5.52       | panpipe          | 5.54       | crate            | 5.55       |
| stole            | 5.62       | red-backed sandp | 5.62       | Brittany spaniel | 5.64       | scorpion         | 5.65       | chickadee        | 5.71       |
| holster          | 5.71       | mobile home      | 5.73       | promontory       | 5.74       | toucan           | 5.76       | half track       | 5.77       |
| vending machine  | 5.81       | tench            | 5.81       | boxer            | 5.82       | wing             | 5.83       | oystercatcher    | 5.84       |
| ruddy turnstone  | 5.84       | park bench       | 5.84       | water jug        | 5.85       | Gordon setter    | 5.89       | magnetic compass | 5.89       |
| English setter   | 5.96       | banjo            | 5.99       | cradle           | 5.99       | steel drum       | 5.99       | analog clock     | 5.99       |
| sandbar          | 6          | coil             | 6          | pickelhaube      | 6          | gong             | 6.03       | triumphal arch   | 6.05       |
| Great Pyrenees   | 6.06       | ski mask         | 6.11       | plunger          | 6.11       | sliding door     | 6.12       | Arabian camel    | 6.12       |
| basketball       | 6.16       | ocarina          | 6.16       | jigsaw puzzle    | 6.16       | amphibian        | 6.16       | red wolf         | 6.18       |
| schipperke       | 6.18       | lynx             | 6.2        | pedestal         | 6.2        | maze             | 6.21       | mask             | 6.21       |
| gorilla          | 6.23       | alligator lizard | 6.23       | milk can         | 6.23       | wall clock       | 6.23       | barber chair     | 6.27       |
| weevil           | 6.29       | malinois         | 6.3        | steam locomotive | 6.32       | buckeye          | 6.36       | French bulldog   | 6.36       |
| beacon           | 6.37       | black and gold g | 6.37       | wardrobe         | 6.37       | bicycle-built-fo | 6.37       | cowboy boot      | 6.42       |
| sea lion         | 6.45       | fire engine      | 6.47       | fiddler crab     | 6.51       | beagle           | 6.52       | teddy            | 6.54       |
| slug             | 6.54       | cock             | 6.55       | geyser           | 6.55       | water snake      | 6.59       | Granny Smith     | 6.6        |
| fig              | 6.61       | warthog          | 6.63       | Egyptian cat     | 6.63       | hair spray       | 6.64       | carpenter's kit  | 6.65       |
| kit fox          | 6.66       | ice bear         | 6.69       | catamaran        | 6.69       | maypole          | 6.71       | ruffed grouse    | 6.74       |
| crane            | 6.74       | snowplow         | 6.75       | American Staffor | 6.78       | triceratops      | 6.81       | bib              | 6.82       |
| hair slide       | 6.82       | hamster          | 6.9        | German short-hai | 6.9        | paddlewheel      | 6.91       | pool table       | 6.92       |
| miniature poodle | 6.93       | thunder snake    | 6.95       | knee pad         | 6.97       | file             | 6.97       | Dungeness crab   | 6.97       |
| tarantula        | 6.98       | parallel bars    | 6.99       | aircraft carrier | 7          | mosquito net     | 7.01       | face powder      | 7.03       |
| racket           | 7.04       | snorkel          | 7.06       | cleaver          | 7.07       | tusker           | 7.11       | packet           | 7.11       |
| football helmet  | 7.16       | handkerchief     | 7.16       | bearskin         | 7.17       | nipple           | 7.17       | hoopskirt        | 7.18       |
| monitor          | 7.2        | washer           | 7.2        | quail            | 7.2        | Italian greyhoun | 7.21       | rugby ball       | 7.25       |
| hornbill         | 7.27       | nail             | 7.28       | dam              | 7.28       | guillotine       | 7.3        | lens cap         | 7.33       |
| roisserie        | 7.36       | chain saw        | 7.4        | street sign      | 7.4        | military uniform | 7.45       | silky terrier    | 7.48       |
| spotted salamand | 7.48       | disk brake       | 7.49       | kite             | 7.49       | soccer ball      | 7.53       | suspension bridg | 7.55       |
| lotion           | 7.56       | goblet           | 7.57       | kimono           | 7.63       | fireboat         | 7.64       | hognose snake    | 7.65       |
| sea slug         | 7.65       | hip              | 7.65       | violin           | 7.66       | cheetah          | 7.66       | mosque           | 7.68       |
| forklift         | 7.7        | book jacket      | 7.71       | entertainment ce | 7.72       | marmot           | 7.73       | mashed potato    | 7.74       |
| fountain         | 7.75       | bison            | 7.77       | tank             | 7.77       | radio telescope  | 7.78       | admiral          | 7.78       |
| hatchet          | 7.79       | fly              | 7.81       | stretcher        | 7.81       | colobus          | 7.81       | jean             | 7.83       |
| ski              | 7.83       | electric fan     | 7.87       | Angora           | 7.87       | pirate           | 7.88       | stupa            | 7.9        |
| prison           | 7.91       | tennis ball      | 7.98       | langur           | 7.98       | capuchin         | 7.98       | dogsled          | 8.01       |
| baseball         | 8.03       | torch            | 8.03       | feather boa      | 8.06       | horizontal bar   | 8.08       | banana           | 8.09       |
| thimble          | 8.09       | lion             | 8.1        | safety pin       | 8.11       | jinrikisha       | 8.13       | bathtub          | 8.16       |
| throne           | 8.18       | pretzel          | 8.18       | grocery store    | 8.2        | jellyfish        | 8.22       | common iguana    | 8.22       |
| Border terrier   | 8.26       | tripod           | 8.3        | hotdog           | 8.31       | thatch           | 8.32       | boa constrictor  | 8.33       |
| dock             | 8.33       | bobsled          | 8.36       | rhinoceros beetl | 8.37       | cello            | 8.4        | bluetick         | 8.42       |
| African chameleo | 8.43       | gibbon           | 8.43       | Cardigan         | 8.43       | dowitcher        | 8.44       | Siamese cat      | 8.45       |
| Brabancon griffo | 8.45       | bull mastiff     | 8.49       | goose            | 8.5        | starfish         | 8.5        | shower curtain   | 8.55       |
| matchstick       | 8.55       | bow              | 8.56       | carousel         | 8.57       | cardigan         | 8.57       | pug              | 8.58       |
| dragonfly        | 8.61       | banded gecko     | 8.62       | wombat           | 8.63       | diaper           | 8.65       | great white shar | 8.65       |



| class            | top1 diff. |
|------------------|------------|------------------|------------|------------------|------------|------------------|------------|------------------|------------|
| space shuttle    | 8.7        | snail            | 8.74       | bulbul           | 8.75       | corkscrew        | 8.75       | basenji          | 8.81       |
| umbrella         | 8.83       | ptarmigan        | 8.84       | marimba          | 8.92       | dung beetle      | 8.93       | oscilloscope     | 8.94       |
| pot              | 8.99       | modem            | 9.03       | electric guitar  | 9.03       | pinwheel         | 9.04       | gown             | 9.04       |
| cockroach        | 9.05       | mushroom         | 9.08       | CD player        | 9.1        | brass            | 9.11       | waffle iron      | 9.13       |
| bolete           | 9.13       | Lhasa            | 9.13       | golden retriever | 9.14       | barn             | 9.17       | Staffordshire bu | 9.18       |
| leafhopper       | 9.18       | hen              | 9.2        | llama            | 9.22       | beach wagon      | 9.23       | standard poodle  | 9.24       |
| wine bottle      | 9.28       | gasmask          | 9.31       | swing            | 9.32       | horse cart       | 9.32       | electric locomot | 9.35       |
| recreational veh | 9.35       | eel              | 9.35       | dome             | 9.41       | tiger beetle     | 9.44       | oboe             | 9.45       |
| American chamele | 9.46       | plastic bag      | 9.47       | beer bottle      | 9.52       | king snake       | 9.54       | bubble           | 9.59       |
| dining table     | 9.6        | tick             | 9.64       | flagpole         | 9.65       | toilet tissue    | 9.7        | black widow      | 9.72       |
| sea snake        | 9.78       | projector        | 9.8        | hammerhead       | 9.82       | mailbox          | 9.83       | soft-coated whea | 9.95       |
| Pembroke         | 10.02      | hare             | 10.03      | chambered nautil | 10.03      | boathouse        | 10.04      | Polaroid camera  | 10.05      |
| mouse            | 10.07      | cornet           | 10.08      | butcher shop     | 10.11      | tow truck        | 10.11      | miniature schnau | 10.12      |
| coho             | 10.19      | switch           | 10.23      | car mirror       | 10.23      | manhole cover    | 10.23      | hard disc        | 10.26      |
| guacamole        | 10.26      | espresso         | 10.31      | Scottish deerhou | 10.34      | web site         | 10.44      | greenhouse       | 10.46      |
| chimpanzee       | 10.5       | beer glass       | 10.5       | grand piano      | 10.57      | flute            | 10.58      | cocker spaniel   | 10.59      |
| desk             | 10.59      | lawn mower       | 10.61      | bagel            | 10.62      | vizsla           | 10.69      | croquet ball     | 10.7       |
| water buffalo    | 10.73      | mongoose         | 10.74      | pop bottle       | 10.74      | Irish wolfhound  | 10.77      | strainer         | 10.77      |
| accordion        | 10.78      | warplane         | 10.78      | upright          | 10.81      | Rhodesian ridgeb | 10.81      | wallaby          | 10.82      |
| cicada           | 10.83      | digital watch    | 10.89      | planetarium      | 10.97      | bolo tie         | 10.99      | cannon           | 11         |
| obelisk          | 11.02      | menu             | 11.02      | Greater Swiss Mo | 11.03      | coral reef       | 11.06      | koala            | 11.07      |
| go-kart          | 11.11      | anemone fish     | 11.12      | chainlink fence  | 11.13      | bullfrog         | 11.16      | bookcase         | 11.17      |
| basset           | 11.21      | marmoset         | 11.24      | cellular telepho | 11.31      | china cabinet    | 11.37      | ashcan           | 11.46      |
| sweatshirt       | 11.48      | space bar        | 11.49      | table lamp       | 11.53      | paintbrush       | 11.53      | wreck            | 11.53      |
| refrigerator     | 11.55      | dishwasher       | 11.55      | microwave        | 11.56      | American black b | 11.57      | hot pot          | 11.57      |
| pill bottle      | 11.58      | loggerhead       | 11.63      | seat belt        | 11.63      | spider monkey    | 11.66      | mud turtle       | 11.66      |
| soap dispenser   | 11.67      | bakery           | 11.68      | doormat          | 11.68      | Doberman         | 11.75      | hamper           | 11.77      |
| guinea pig       | 11.77      | punching bag     | 11.8       | police van       | 11.9       | killer whale     | 11.91      | miniature pinsch | 11.94      |
| reflex camera    | 11.95      | rubber eraser    | 11.96      | candle           | 11.99      | howler monkey    | 12.05      | traffic light    | 12.07      |
| cup              | 12.17      | pizza            | 12.22      | mountain tent    | 12.25      | stove            | 12.32      | vase             | 12.33      |
| ladybug          | 12.35      | balance beam     | 12.39      | whistle          | 12.39      | caldron          | 12.42      | garter snake     | 12.51      |
| motor scooter    | 12.66      | Shetland sheepdo | 12.73      | binder           | 12.75      | padlock          | 12.77      | hyena            | 12.81      |
| toyshop          | 12.86      | impala           | 12.87      | Madagascar cat   | 12.87      | microphone       | 12.87      | Border collie    | 12.88      |
| mailbag          | 12.97      | cab              | 13         | sea urchin       | 13.02      | acorn            | 13.08      | Lakeland terrier | 13.1       |
| crash helmet     | 13.11      | stingray         | 13.12      | canoe            | 13.2       | carton           | 13.21      | rain barrel      | 13.28      |
| tree frog        | 13.28      | pencil box       | 13.29      | American alligat | 13.3       | can opener       | 13.36      | coyote           | 13.37      |
| hand blower      | 13.47      | fountain pen     | 13.63      | bucket           | 13.65      | golfcart         | 13.66      | picket fence     | 13.69      |
| shovel           | 13.72      | chiton           | 13.77      | cricket          | 13.81      | pencil sharpener | 13.83      | cairn            | 13.91      |
| custard apple    | 13.92      | Christmas stocki | 13.94      | yurt             | 13.96      | ringneck snake   | 13.96      | maraca           | 14.02      |
| garbage truck    | 14.06      | lycaenid         | 14.12      | drum             | 14.13      | rocking chair    | 14.13      | dumbbell         | 14.19      |
| barrow           | 14.2       | crutch           | 14.21      | saltshaker       | 14.24      | fur coat         | 14.32      | moped            | 14.41      |
| shower cap       | 14.46      | wok              | 14.5       | syringe          | 14.51      | sarong           | 14.53      | parking meter    | 14.55      |
| English springer | 14.67      | badger           | 14.85      | iPod             | 14.88      | altar            | 14.9       | iron             | 14.92      |
| wig              | 14.94      | Crock Pot        | 14.97      | washbasin        | 15.03      | necklace         | 15.08      | clog             | 15.08      |
| scuba diver      | 15.16      | stethoscope      | 15.16      | chest            | 15.16      | harmonica        | 15.21      | minivan          | 15.26      |
| ram              | 15.43      | wallet           | 15.47      | gas pump         | 15.48      | four-poster      | 15.5       | plow             | 15.5       |
| diamondback      | 15.51      | meerkat          | 15.52      | wooden spoon     | 15.57      | confectionery    | 15.63      | sandal           | 15.65      |
| water bottle     | 15.65      | submarine        | 15.7       | crayfish         | 15.77      | pay-phone        | 15.81      | bassinet         | 15.83      |
| black-footed fer | 15.91      | puffer           | 16.05      | sewing machine   | 16.1       | ladle            | 16.12      | binoculars       | 16.18      |
| patio            | 16.3       | burrito          | 16.38      | oil filter       | 16.38      | reel             | 16.53      | sea cucumber     | 16.64      |
| television       | 16.65      | plate            | 16.68      | toaster          | 16.7       | lab coat         | 16.81      | baboon           | 16.87      |
| green snake      | 16.95      | power drill      | 16.97      | joystick         | 16.98      | timber wolf      | 16.98      | measuring cup    | 17.03      |
| volleyball       | 17.03      | backpack         | 17.05      | conch            | 17.07      | shoe shop        | 17.08      | buckle           | 17.1       |
| jeep             | 17.2       | cash machine     | 17.22      | box turtle       | 17.25      | giant schnauzer  | 17.29      | Labrador retriev | 17.38      |
| acorn squash     | 17.4       | squirrel monkey  | 17.49      | teapot           | 17.5       | turnstile        | 17.56      | cheeseburger     | 17.65      |
| breakwater       | 17.7       | church           | 17.74      | mortar           | 17.89      | spindle          | 18.29      | printer          | 18.3       |
| bikini           | 18.32      | lighter          | 18.44      | cinema           | 18.46      | chime            | 18.63      | pitcher          | 18.7       |
| mantis           | 18.73      | tractor          | 18.76      | crib             | 18.8       | barbershop       | 18.8       | tricycle         | 18.96      |
| unicycle         | 19.07      | home theater     | 19.13      | hermit crab      | 19.2       | radio            | 19.29      | piggy bank       | 19.37      |
| castle           | 19.46      | restaurant       | 19.52      | shopping basket  | 19.82      | sunglasses       | 19.84      | soup bowl        | 19.96      |
| agama            | 20.49      | vacuum           | 20.53      | harvester        | 20.57      | birdhouse        | 20.69      | perfume          | 20.97      |
| bow tie          | 21.03      | ice cream        | 21.16      | shield           | 21.39      | medicine chest   | 21.98      | cowboy hat       | 22.56      |
| coffepot         | 22.57      | ice lolly        | 22.69      | Dutch oven       | 22.75      | bookshop         | 22.9       | apron            | 22.98      |
| poncho           | 23.41      | mitten           | 23.6       | groom            | 23.63      | swab             | 23.72      | otter            | 23.91      |
| bonnet           | 24.37      | schooner         | 24.54      | stage            | 24.56      | tray             | 25.09      | garden spider    | 25.15      |
| toilet seat      | 25.8       | desktop computer | 25.83      | espresso maker   | 26.21      | purse            | 26.84      | scale            | 26.87      |
| convertible      | 26.98      | oxcart           | 27.62      | macaque          | 27.77      | wolf spider      | 28.4       | mortarboard      | 29.46      |
| hammer           | 29.5       | pillow           | 29.56      | jersey           | 29.87      | safe             | 30.35      | pickup           | 33.25      |

## E Resnet50 Per-Class Accuracy Difference (with - without weight decay)

| class            | top1 diff. | class            | top1 diff. | class         | top1 diff. | class          | top1 diff. | class            | top1 diff. |
|------------------|------------|------------------|------------|---------------|------------|----------------|------------|------------------|------------|
| gong             | -26.41     | black and gold g | -18.7      | partridge     | -18        | projectile     | -17.31     | microphone       | -16.79     |
| desktop computer | -14.99     | American chamele | -13.9      | rifle         | -12.6      | chime          | -12.5      | mailbag          | -12.42     |
| syringe          | -11.52     | CD player        | -11.33     | rubber eraser | -11.19     | can opener     | -11.11     | pencil sharpener | -10.9      |
| cornet           | -10.73     | motor scooter    | -10.65     | strainer      | -10.63     | garden spider  | -10.6      | shovel           | -10.55     |
| plunger          | -10.55     | mousetrap        | -10.09     | ice lolly     | -9.7       | vacuum         | -9.65      | doormat          | -9.6       |
| soap dispenser   | -9.51      | wine bottle      | -9.4       | breakwater    | -9.38      | spotlight      | -9.15      | modem            | -9.12      |
| radio            | -8.98      | sidewinder       | -8.97      | banana        | -8.85      | damselfly      | -8.73      | envelope         | -8.69      |
| television       | -8.64      | brassiere        | -8.5       | matchstick    | -8.46      | coffepot       | -8.43      | water jug        | -8.4       |
| pitcher          | -8.4       | lighter          | -8.34      | tiger shark   | -8.31      | dining table   | -8.26      | Labrador retriev | -8.23      |
| miniskirt        | -8.2       | bolete           | -8.1       | lakeside      | -8.1       | redbone        | -8.07      | grocery store    | -8.03      |
| pencil box       | -8.01      | African crocodil | -8         | coffee mug    | -7.93      | ear            | -7.91      | wallet           | -7.89      |
| dome             | -7.83      | mouse            | -7.79      | vase          | -7.78      | toy poodle     | -7.77      | maillot          | -7.76      |
| hammer           | -7.75      | bow              | -7.73      | book jacket   | -7.68      | face powder    | -7.67      | tractor          | -7.59      |
| whippet          | -7.58      | ballpoint        | -7.54      | ruffed grouse | -7.5       | English setter | -7.4       | Eskimo dog       | -7.4       |
| spatula          | -7.29      | cannon           | -7.22      | birdhouse     | -7.21      | paintbrush     | -7.18      | Chihuahua        | -7.18      |

| class            | top1 diff. |
|------------------|------------|------------------|------------|------------------|------------|------------------|------------|------------------|------------|
| Band Aid         | -7.17      | cuirass          | -7.17      | mortar           | -7.13      | paper towel      | -7.13      | cassette player  | -7.1       |
| violin           | -7.01      | rugby ball       | -6.99      | mailliot         | -6.98      | slug             | -6.97      | long-horned beet | -6.97      |
| sunglasses       | -6.97      | shield           | -6.96      | basset           | -6.93      | muzzle           | -6.91      | harvester        | -6.9       |
| wolf spider      | -6.9       | apron            | -6.81      | meerkat          | -6.72      | hand blower      | -6.67      | seat belt        | -6.61      |
| accordion        | -6.6       | mink             | -6.55      | flute            | -6.55      | gown             | -6.47      | mashed potato    | -6.47      |
| hammerhead       | -6.46      | packet           | -6.4       | barber chair     | -6.4       | restaurant       | -6.33      | red wolf         | -6.32      |
| reel             | -6.22      | badger           | -6.2       | cleaver          | -6.2       | pop bottle       | -6.16      | bluetick         | -6.16      |
| macaque          | -6.15      | Brabancon griffo | -6.13      | swimming trunks  | -6.11      | nail             | -6.11      | bucket           | -6.09      |
| spindle          | -6.06      | bow tie          | -6.03      | quill            | -5.98      | plate            | -5.97      | breastplate      | -5.95      |
| otter            | -5.94      | eel              | -5.94      | common newt      | -5.93      | Dungeness crab   | -5.92      | safe             | -5.89      |
| drumstick        | -5.83      | dumbbell         | -5.82      | corkscrew        | -5.82      | hook             | -5.74      | rotisserie       | -5.72      |
| warplane         | -5.66      | clog             | -5.64      | coyote           | -5.61      | stretcher        | -5.59      | Staffordshire bu | -5.59      |
| kit fox          | -5.57      | street sign      | -5.55      | Yorkshire terrie | -5.54      | lotion           | -5.53      | agaric           | -5.5       |
| mixing bowl      | -5.47      | beaker           | -5.39      | racket           | -5.38      | safety pin       | -5.37      | basenji          | -5.35      |
| Irish terrier    | -5.32      | catamaran        | -5.32      | langur           | -5.28      | switch           | -5.28      | apiary           | -5.25      |
| custard apple    | -5.21      | plastic bag      | -5.2       | electric guitar  | -5.19      | wild boar        | -5.17      | eggnog           | -5.16      |
| stethoscope      | -5.13      | mud turtle       | -5.12      | fly              | -5.12      | diaper           | -5.08      | notebook         | -5.04      |
| dial telephone   | -5.01      | pajama           | -4.95      | solar dish       | -4.95      | ashcan           | -4.87      | ant              | -4.85      |
| soccer ball      | -4.83      | Lakeland terrier | -4.8       | swab             | -4.77      | toyshop          | -4.75      | mitten           | -4.74      |
| joystick         | -4.72      | black-footed fer | -4.72      | patio            | -4.7       | bonnet           | -4.67      | maraca           | -4.65      |
| home theater     | -4.65      | crane            | -4.63      | sandal           | -4.6       | cloak            | -4.6       | hen              | -4.59      |
| water buffalo    | -4.59      | tray             | -4.58      | cricket          | -4.51      | oboe             | -4.47      | teddy            | -4.46      |
| diamondback      | -4.45      | tile roof        | -4.44      | hand-held comput | -4.44      | cowboy boot      | -4.44      | boxer            | -4.43      |
| wok              | -4.42      | fountain         | -4.42      | standard poodle  | -4.4       | Maltese dog      | -4.4       | pier             | -4.35      |
| trombone         | -4.33      | cockroach        | -4.33      | prison           | -4.33      | computer keyboar | -4.32      | studio couch     | -4.3       |
| West Highland wh | -4.29      | Tibetan terrier  | -4.28      | Saint Bernard    | -4.27      | French loaf      | -4.27      | printer          | -4.27      |
| cowboy hat       | -4.13      | scabbard         | -4.13      | typewriter keybo | -4.1       | beagle           | -4.08      | tusker           | -4.04      |
| barrel           | -4.03      | centipede        | -3.95      | worm fence       | -3.93      | American black b | -3.92      | crash helmet     | -3.92      |
| tiger cat        | -3.92      | timber wolf      | -3.89      | pot              | -3.86      | bulbul           | -3.86      | kite             | -3.85      |
| electric locomot | -3.85      | wreck            | -3.84      | water bottle     | -3.83      | wardrobe         | -3.83      | thunder snake    | -3.83      |
| chocolate sauce  | -3.8       | Bernese mountain | -3.78      | Angora           | -3.78      | stage            | -3.77      | soup bowl        | -3.76      |
| coho             | -3.76      | conch            | -3.72      | space heater     | -3.71      | Border collie    | -3.71      | pineapple        | -3.7       |
| squirrel monkey  | -3.69      | Pomeranian       | -3.68      | hyena            | -3.67      | cup              | -3.65      | neck brace       | -3.65      |
| tiger            | -3.65      | bloodhound       | -3.64      | mongoose         | -3.61      | leafhopper       | -3.58      | pool table       | -3.58      |
| hair slide       | -3.57      | crutch           | -3.54      | entertainment ce | -3.51      | mask             | -3.48      | tick             | -3.44      |
| Pembroke         | -3.42      | vestment         | -3.42      | pill bottle      | -3.4       | bakery           | -3.4       | dishrag          | -3.4       |
| cocker spaniel   | -3.36      | window screen    | -3.35      | barbershop       | -3.3       | lumbermill       | -3.3       | espresso maker   | -3.29      |
| handkerchief     | -3.27      | Brittany spaniel | -3.26      | acorn squash     | -3.22      | piggy bank       | -3.22      | loudspeaker      | -3.21      |
| dingo            | -3.21      | church           | -3.19      | spider web       | -3.19      | washbasin        | -3.19      | park bench       | -3.17      |
| bee              | -3.17      | tree frog        | -3.15      | goblet           | -3.13      | thresher         | -3.09      | stone wall       | -3.07      |
| puffer           | -3.06      | porcupine        | -3.05      | Italian greyhoun | -3.05      | anemone fish     | -3.04      | brown bear       | -3.04      |
| crayfish         | -3.03      | loupe            | -3         | knee pad         | -3         | jinrikisha       | -2.98      | pick             | -2.96      |
| gasmask          | -2.95      | wallaby          | -2.95      | Siamese cat      | -2.94      | viaduct          | -2.93      | night snake      | -2.93      |
| leaf beetle      | -2.92      | necklace         | -2.9       | llama            | -2.9       | banded gecko     | -2.88      | echidna          | -2.86      |
| Scottish deerhou | -2.85      | African hunting  | -2.85      | Greater Swiss Mo | -2.84      | hare             | -2.84      | desk             | -2.83      |
| barrow           | -2.82      | wool             | -2.81      | mortarboard      | -2.81      | caldron          | -2.8       | banjo            | -2.79      |
| axolotl          | -2.78      | photocopier      | -2.75      | plate rack       | -2.74      | washer           | -2.71      | pillow           | -2.71      |
| walking stick    | -2.7       | Petri dish       | -2.7       | American lobster | -2.69      | butternut squash | -2.67      | red-backed sandp | -2.67      |
| mosquito net     | -2.67      | liner            | -2.66      | cardigan         | -2.63      | wall clock       | -2.62      | vending machine  | -2.62      |
| screwdriver      | -2.61      | running shoe     | -2.6       | malinois         | -2.6       | rhinoceros beetl | -2.59      | African chameleo | -2.58      |
| hamper           | -2.57      | beach wagon      | -2.54      | bassoon          | -2.51      | garter snake     | -2.51      | Arctic fox       | -2.48      |
| nipple           | -2.47      | military uniform | -2.46      | vulture          | -2.45      | triceratops      | -2.45      | dam              | -2.44      |
| jersey           | -2.44      | measuring cup    | -2.4       | sarong           | -2.4       | beaver           | -2.39      | paddle           | -2.38      |
| little blue hero | -2.38      | ibex             | -2.37      | shower cap       | -2.35      | sea cucumber     | -2.34      | drilling platfor | -2.33      |
| rule             | -2.32      | fire screen      | -2.31      | brambling        | -2.3       | vine snake       | -2.27      | African elephant | -2.27      |
| Newfoundland     | -2.25      | football helmet  | -2.24      | recreational veh | -2.23      | abacus           | -2.23      | knot             | -2.21      |
| Kerry blue terri | -2.18      | broom            | -2.18      | Border terrier   | -2.18      | Appenzeller      | -2.17      | ski mask         | -2.15      |
| ram              | -2.15      | gas pump         | -2.1       | howler monkey    | -2.08      | platypus         | -2.08      | yurt             | -2.02      |
| purse            | -2.02      | bannister        | -2.01      | leopard          | -2         | guenon           | -2         | electric ray     | -2         |
| snail            | -2         | shopping basket  | -1.99      | pug              | -1.96      | ballplayer       | -1.91      | borzoi           | -1.9       |
| stole            | -1.87      | bison            | -1.85      | steel drum       | -1.85      | fireboat         | -1.85      | Blenheim spaniel | -1.85      |
| turnstile        | -1.8       | harmonica        | -1.8       | bighorn          | -1.8       | skunk            | -1.79      | panpipe          | -1.78      |
| punching bag     | -1.77      | Mexican hairless | -1.77      | tobacco shop     | -1.77      | tricycle         | -1.77      | guillotine       | -1.75      |
| parachute        | -1.74      | prairie chicken  | -1.71      | fountain pen     | -1.69      | rain barrel      | -1.68      | white stork      | -1.68      |
| coil             | -1.67      | albatross        | -1.65      | carton           | -1.65      | hog              | -1.63      | reflex camera    | -1.61      |
| hamster          | -1.58      | bubble           | -1.58      | water snake      | -1.57      | chest            | -1.53      | wooden spoon     | -1.53      |
| shoji            | -1.53      | burrito          | -1.52      | power drill      | -1.51      | swing            | -1.5       | corn             | -1.49      |
| volleyball       | -1.48      | potter's wheel   | -1.47      | electric fan     | -1.44      | gyromitra        | -1.42      | binder           | -1.41      |
| radiator         | -1.4       | ladle            | -1.4       | boa constrictor  | -1.39      | toucan           | -1.38      | guinea pig       | -1.37      |
| pole             | -1.37      | acoustic guitar  | -1.36      | rock crab        | -1.32      | combination lock | -1.3       | shoe shop        | -1.29      |
| digital clock    | -1.28      | holster          | -1.27      | minivan          | -1.26      | Afghan hound     | -1.23      | buckle           | -1.22      |
| hard disc        | -1.18      | butcher shop     | -1.18      | barn spider      | -1.18      | bassinet         | -1.17      | marmot           | -1.16      |
| sweatshirt       | -1.14      | armadillo        | -1.13      | trilobite        | -1.13      | stopwatch        | -1.12      | rock python      | -1.12      |
| American coot    | -1.12      | ski              | -1.1       | gar              | -1.07      | warthog          | -1.05      | bustard          | -1.05      |
| American egret   | -1.04      | honeycomb        | -1.04      | grey fox         | -1.04      | bathub           | -1.02      | European gallinu | -1         |
| hourglass        | -0.99      | ping-pong ball   | -0.96      | microwave        | -0.96      | cabbage butterfl | -0.96      | French bulldog   | -0.93      |
| schooner         | -0.93      | spiny lobster    | -0.91      | Japanese spaniel | -0.9       | sulphur-crested  | -0.88      | gorilla          | -0.88      |
| frying pan       | -0.88      | sea snake        | -0.87      | grille           | -0.85      | hummingbird      | -0.84      | quilt            | -0.84      |
| snowplow         | -0.83      | red wine         | -0.83      | isopod           | -0.8       | whistle          | -0.79      | mushroom         | -0.78      |
| iron             | -0.78      | vault            | -0.77      | bee eater        | -0.77      | Indian elephant  | -0.76      | seashore         | -0.75      |
| Welsh springer s | -0.73      | geyser           | -0.72      | canoe            | -0.7       | sea slug         | -0.69      | hartebeest       | -0.68      |
| coral reef       | -0.67      | curly-coated ret | -0.66      | marmoset         | -0.65      | scorpion         | -0.64      | three-toed sloth | -0.63      |
| mailbox          | -0.63      | brain coral      | -0.63      | jack-o'-lantern  | -0.62      | Leonberg         | -0.6       | ice cream        | -0.59      |
| Bedlington terri | -0.58      | hay              | -0.58      | dalmatian        | -0.57      | broccoli         | -0.57      | sombrero         | -0.53      |
| dishwasher       | -0.53      | oscilloscope     | -0.52      | sax              | -0.51      | sloth bear       | -0.5       | hippopotamus     | -0.5       |
| schipperke       | -0.5       | minibus          | -0.5       | toilet seat      | -0.44      | trifle           | -0.44      | crate            | -0.42      |
| goose            | -0.42      | Rhodesian ridgeb | -0.42      | dock             | -0.41      | starfish         | -0.41      | barbell          | -0.41      |
| Old English shee | -0.4       | hot pot          | -0.39      | disk brake       | -0.38      | Norfolk terrier  | -0.37      | pirate           | -0.35      |
| Gordon setter    | -0.34      | carpenter's kit  | -0.32      | sandbar          | -0.31      | cairn            | -0.31      | stingray         | -0.28      |
| mountain tent    | -0.27      | promontory       | -0.25      | macaw            | -0.25      | Indian cobra     | -0.24      | cucumber         | -0.24      |
| steel arch bridg | -0.23      | monitor          | -0.2       | missile          | -0.19      | vizsla           | -0.19      | limpkin          | -0.17      |

| class            | top1 diff. |
|------------------|------------|------------------|------------|------------------|------------|------------------|------------|------------------|------------|
| admiral          | -0.17      | eft              | -0.17      | upright          | -0.17      | keeshond         | -0.17      | dowitcher        | -0.17      |
| throne           | -0.16      | Airedale         | -0.16      | lacewing         | -0.14      | Model T          | -0.14      | binoculars       | -0.12      |
| bib              | -0.12      | Rottweiler       | -0.1       | Scotch terrier   | -0.1       | marimba          | -0.09      | acorn            | -0.09      |
| fiddler crab     | -0.09      | sleeping bag     | -0.08      | black swan       | -0.07      | cliff            | -0.06      | siamang          | -0.06      |
| hip              | -0.04      | Chesapeake Bay r | -0.04      | groenendael      | -0.03      | giant schnauzer  | -0.02      | lampshade        | -0.01      |
| umbrella         | -0.01      | yellow lady's sl | 0          | basketball       | 0          | bell pepper      | 0          | goldfish         | 0.01       |
| velvet           | 0.04       | flagpole         | 0.05       | jacamar          | 0.06       | jean             | 0.06       | green mamba      | 0.09       |
| red-breasted mer | 0.1        | freight car      | 0.1        | pedestal         | 0.12       | plane            | 0.12       | confectionery    | 0.14       |
| saltshaker       | 0.14       | plow             | 0.14       | African grey     | 0.16       | harp             | 0.17       | feather boa      | 0.17       |
| zebra            | 0.2        | orange           | 0.22       | weasel           | 0.22       | impala           | 0.23       | peacock          | 0.23       |
| shower curtain   | 0.23       | buckeye          | 0.24       | tub              | 0.24       | puck             | 0.25       | Persian cat      | 0.27       |
| shopping cart    | 0.27       | bittern          | 0.27       | whiptail         | 0.28       | scale            | 0.28       | oxcart           | 0.28       |
| cocktail shaker  | 0.29       | lionfish         | 0.3        | koala            | 0.31       | revolver         | 0.32       | drum             | 0.32       |
| jeep             | 0.34       | ringneck snake   | 0.34       | letter opener    | 0.37       | table lamp       | 0.37       | spoonbill        | 0.37       |
| sorrel           | 0.4        | megalith         | 0.41       | fox squirrel     | 0.43       | lifeboat         | 0.43       | waffle iron      | 0.45       |
| grey whale       | 0.47       | daisy            | 0.48       | lesser panda     | 0.48       | water tower      | 0.51       | milk can         | 0.52       |
| agama            | 0.52       | totem pole       | 0.54       | papillon         | 0.54       | remote control   | 0.54       | teapot           | 0.55       |
| iPod             | 0.55       | EntleBucher      | 0.56       | chiton           | 0.58       | hatchet          | 0.59       | hornbill         | 0.59       |
| cassette         | 0.59       | refrigerator     | 0.6        | kuvasz           | 0.6        | earthstar        | 0.6        | monarch          | 0.6        |
| weevil           | 0.62       | go-kart          | 0.62       | greenhouse       | 0.63       | flat-coated retr | 0.64       | Christmas stocki | 0.65       |
| leatherback turt | 0.66       | Crock Pot        | 0.67       | traffic light    | 0.68       | Loafer           | 0.69       | space shuttle    | 0.71       |
| scuba diver      | 0.71       | cellular telepho | 0.73       | Bouvier des Flan | 0.73       | jaguar           | 0.74       | ice bear         | 0.76       |
| Windsor tie      | 0.77       | racer            | 0.79       | slot             | 0.82       | jigsaw puzzle    | 0.83       | tench            | 0.85       |
| dough            | 0.86       | picket fence     | 0.87       | balance beam     | 0.89       | stupa            | 0.89       | Lhasa            | 0.91       |
| ostrich          | 0.91       | tripod           | 0.95       | giant panda      | 0.97       | organ            | 0.99       | file             | 1          |
| chambered nautil | 1.02       | chain saw        | 1.04       | lorikeet         | 1.05       | cock             | 1.06       | box turtle       | 1.07       |
| ptarmigan        | 1.08       | jay              | 1.09       | cicada           | 1.1        | chiffonier       | 1.1        | sea lion         | 1.12       |
| spotted salamand | 1.14       | stove            | 1.15       | cheetah          | 1.16       | indigo bunting   | 1.18       | limousine        | 1.19       |
| Walker hound     | 1.19       | stinkhorn        | 1.2        | indri            | 1.2        | triumphal arch   | 1.23       | polecat          | 1.24       |
| toilet tissue    | 1.26       | strawberry       | 1.29       | window shade     | 1.3        | baboon           | 1.3        | cauliflower      | 1.3        |
| titi             | 1.31       | sock             | 1.31       | oxygen mask      | 1.31       | bookcase         | 1.33       | lion             | 1.33       |
| sewing machine   | 1.34       | Great Pyrenees   | 1.37       | European fire sa | 1.37       | orangutan        | 1.38       | water ouzel      | 1.39       |
| Irish setter     | 1.42       | rocking chair    | 1.42       | head cabbage     | 1.43       | junco            | 1.44       | croquet ball     | 1.48       |
| cinema           | 1.49       | chimpanzee       | 1.5        | tailed frog      | 1.51       | forklift         | 1.53       | ruddy turnstone  | 1.54       |
| planetarium      | 1.54       | wig              | 1.55       | parking meter    | 1.55       | airliner         | 1.56       | valley           | 1.57       |
| pickelhaube      | 1.61       | clumber          | 1.63       | robin            | 1.64       | sturgeon         | 1.65       | pelican          | 1.67       |
| Sussex spaniel   | 1.69       | thimble          | 1.7        | mantis           | 1.72       | coucal           | 1.73       | palace           | 1.73       |
| container ship   | 1.74       | tabby            | 1.76       | black stork      | 1.77       | snow leopard     | 1.77       | theater curtain  | 1.78       |
| green snake      | 1.79       | groom            | 1.79       | web site         | 1.8        | speedboat        | 1.8        | great grey owl   | 1.84       |
| sea urchin       | 1.86       | wombat           | 1.86       | chain mail       | 1.87       | cardoon          | 1.88       | carbonara        | 1.89       |
| bobsled          | 1.89       | barn             | 1.89       | redshank         | 1.9        | pretzel          | 1.92       | affenpinscher    | 1.93       |
| bottlecap        | 1.93       | balloon          | 1.95       | slide rule       | 1.96       | trolleybus       | 1.96       | otterhound       | 1.97       |
| jackfruit        | 1.98       | carousel         | 2          | bath towel       | 2          | cash machine     | 2          | nematode         | 2.01       |
| consomme         | 2.02       | alligator lizard | 2.03       | tarantula        | 2.05       | grand piano      | 2.07       | steam locomotive | 2.08       |
| lemon            | 2.1        | crib             | 2.1        | snorkel          | 2.12       | zucchini         | 2.13       | toaster          | 2.15       |
| Granny Smith     | 2.17       | proboscis monkey | 2.18       | king snake       | 2.2        | flamingo         | 2.2        | chickadee        | 2.2        |
| Sealyham terrier | 2.21       | cello            | 2.22       | hen-of-the-woods | 2.24       | dogsled          | 2.24       | horse cart       | 2.24       |
| dhole            | 2.25       | car mirror       | 2.26       | manhole cover    | 2.28       | overskirt        | 2.29       | poncho           | 2.31       |
| English springer | 2.32       | analog clock     | 2.32       | mountain bike    | 2.33       | flatworm         | 2.34       | hermit crab      | 2.35       |
| thatch           | 2.35       | cab              | 2.38       | tape player      | 2.39       | Siberian husky   | 2.39       | grasshopper      | 2.4        |
| streetcar        | 2.44       | English foxhound | 2.45       | sulphur butterfl | 2.5        | French horn      | 2.51       | horned viper     | 2.51       |
| barracouta       | 2.52       | dugong           | 2.53       | screw            | 2.53       | tank             | 2.53       | trench coat      | 2.55       |
| quail            | 2.56       | black-and-tan co | 2.57       | odometer         | 2.57       | parallel bars    | 2.57       | maypole          | 2.58       |
| tiger beetle     | 2.58       | Dandie Dinmont   | 2.59       | bolo tie         | 2.6        | Tibetan mastiff  | 2.61       | ground beetle    | 2.61       |
| yawl             | 2.61       | airship          | 2.65       | harvestman       | 2.66       | king crab        | 2.67       | Egyptian cat     | 2.68       |
| house finch      | 2.68       | hotdog           | 2.69       | tennis ball      | 2.69       | four-poster      | 2.69       | cliff dwelling   | 2.7        |
| pinwheel         | 2.72       | bagel            | 2.76       | malamute         | 2.81       | medicine chest   | 2.81       | school bus       | 2.81       |
| oystercatcher    | 2.81       | backpack         | 2.82       | torch            | 2.84       | red fox          | 2.86       | convertible      | 2.87       |
| Ibizan hound     | 2.97       | terrapin         | 2.97       | dung beetle      | 2.97       | china cabinet    | 2.98       | amphibian        | 2.99       |
| golf ball        | 3          | lawn mower       | 3.01       | bicycle-built-fo | 3.02       | unicycle         | 3.03       | German short-hai | 3.04       |
| cougar           | 3.04       | crossword puzzle | 3.05       | coral fungus     | 3.06       | common iguana    | 3.09       | espresso         | 3.11       |
| bulletproof vest | 3.13       | moving van       | 3.14       | assault rifle    | 3.14       | meat loaf        | 3.15       | perfume          | 3.15       |
| beer glass       | 3.16       | snowmobile       | 3.16       | drake            | 3.16       | German shepherd  | 3.17       | ocarina          | 3.18       |
| folding chair    | 3.18       | Gila monster     | 3.18       | comic book       | 3.18       | bullfrog         | 3.22       | goldfinch        | 3.24       |
| magpie           | 3.24       | Madagascar cat   | 3.24       | suit             | 3.25       | padlock          | 3.25       | cheeseburger     | 3.26       |
| sea anemone      | 3.27       | whiskey jug      | 3.28       | miniature pinsch | 3.29       | baseball         | 3.29       | black widow      | 3.31       |
| guacamole        | 3.31       | Arabian camel    | 3.32       | hoopskirt        | 3.33       | hair spray       | 3.37       | prayer rug       | 3.4        |
| artichoke        | 3.4        | colobus          | 3.43       | sundial          | 3.44       | patas            | 3.45       | maze             | 3.47       |
| pickup           | 3.47       | projector        | 3.52       | fur coat         | 3.54       | gondola          | 3.56       | Samoyed          | 3.57       |
| lynx             | 3.59       | horizontal bar   | 3.65       | lens cap         | 3.67       | golfcart         | 3.67       | bell cote        | 3.68       |
| submarine        | 3.7        | bullet train     | 3.71       | frilled lizard   | 3.73       | ringlet          | 3.74       | Saluki           | 3.76       |
| bald eagle       | 3.77       | trailer truck    | 3.77       | beer bottle      | 3.79       | chow             | 3.8        | black grouse     | 3.84       |
| radio telescope  | 3.84       | miniature schnau | 3.84       | Boston bull      | 3.85       | komondor         | 3.88       | Australian terri | 3.88       |
| lab coat         | 3.9        | laptop           | 3.92       | white wolf       | 3.93       | king penguin     | 3.97       | boathouse        | 4.08       |
| gazelle          | 4.1        | ambulance        | 4.17       | garbage truck    | 4.19       | fig              | 4.22       | green lizard     | 4.24       |
| barometer        | 4.24       | Shetland sheepdo | 4.25       | ladybug          | 4.28       | brass            | 4.35       | library          | 4.35       |
| rapeseed         | 4.4        | chain            | 4.41       | kelpie           | 4.41       | mobile home      | 4.42       | Polaroid camera  | 4.47       |
| loggerhead       | 4.48       | paddlewheel      | 4.49       | police van       | 4.53       | silky terrier    | 4.53       | pomegranate      | 4.59       |
| Pekinese         | 4.6        | bikini           | 4.61       | fire engine      | 4.66       | spider monkey    | 4.69       | ox               | 4.77       |
| sports car       | 4.83       | Weimaraner       | 4.84       | Irish water span | 4.86       | briard           | 4.87       | Great Dane       | 4.9        |
| gibbon           | 4.92       | menu             | 4.98       | pay-phone        | 5.04       | Komodo dragon    | 5.09       | bearskin         | 5.1        |
| sliding door     | 5.16       | hognose snake    | 5.18       | Irish wolfhound  | 5.2        | kimono           | 5.22       | scoreboard       | 5.22       |
| oil filter       | 5.26       | mosque           | 5.3        | moped            | 5.35       | dragonfly        | 5.4        | soft-coated whea | 5.44       |
| golden retriever | 5.52       | volcano          | 5.58       | Norwich terrier  | 5.58       | passenger car    | 5.72       | crane            | 5.89       |
| monastery        | 5.9        | chainlink fence  | 5.95       | bathing cap      | 5.95       | Norwegian elkhou | 6.06       | standard schnauz | 6.14       |
| jellyfish        | 6.15       | digital watch    | 6.15       | American Staffor | 6.28       | pizza            | 6.3        | collie           | 6.32       |
| capuchin         | 6.34       | lycaenid         | 6.35       | car wheel        | 6.36       | obelisk          | 6.42       | bull mastiff     | 6.45       |
| bookshop         | 6.5        | suspension bridg | 6.62       | sunscreens       | 6.7        | spaghetti squash | 6.76       | tow truck        | 6.78       |
| rock beauty      | 7.29       | altar            | 7.32       | wood rabbit      | 7.53       | American alligat | 7.57       | alp              | 7.62       |
| killer whale     | 7.66       | half track       | 7.93       | academic gown    | 7.93       | beacon           | 7.94       | sunglass         | 7.95       |
| castle           | 8.19       | candle           | 8.21       | cradle           | 8.36       | screen           | 8.52       | magnetic compass | 8.7        |

| class            | top1 diff. | class       | top1 diff. | class      | top1 diff. | class            | top1 diff. | class            | top1 diff. |
|------------------|------------|-------------|------------|------------|------------|------------------|------------|------------------|------------|
| lipstick         | 8.86       | toy terrier | 9.08       | Dutch oven | 9.47       | aircraft carrier | 9.47       | abaya            | 9.55       |
| great white shar | 10.03      | Doberman    | 10.1       | Shih-Tzu   | 10.17      | potpie           | 10.35      | Cardigan         | 10.35      |
| space bar        | 10.92      | wing        | 11.48      | trimaran   | 11.87      | wire-haired fox  | 17.64      | miniature poodle | 21.65      |

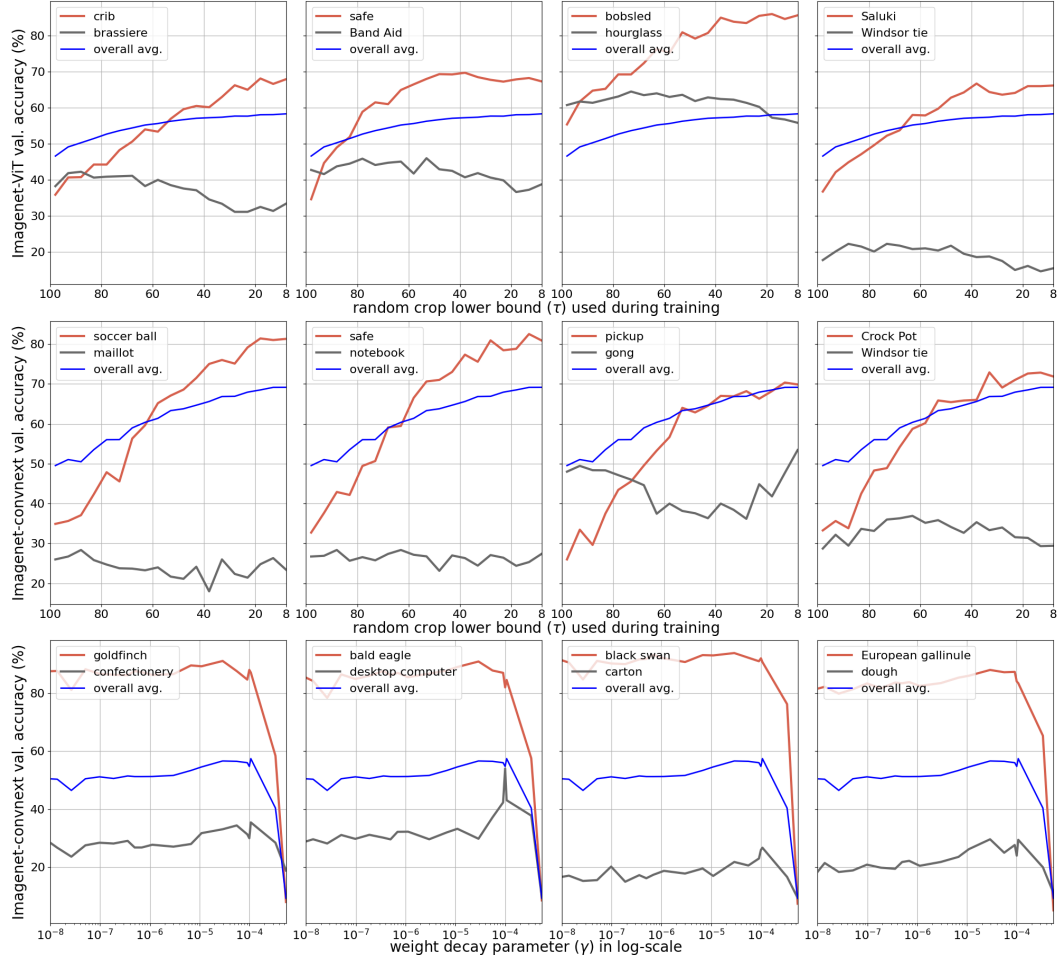

Figure 8: Reproduction of Figs. 12 and 13 but now with ViT small and random crop DA (top), Convnext-Tiny and random crop DA (middle) and Convnext-Tiny and weight decay (bottom).

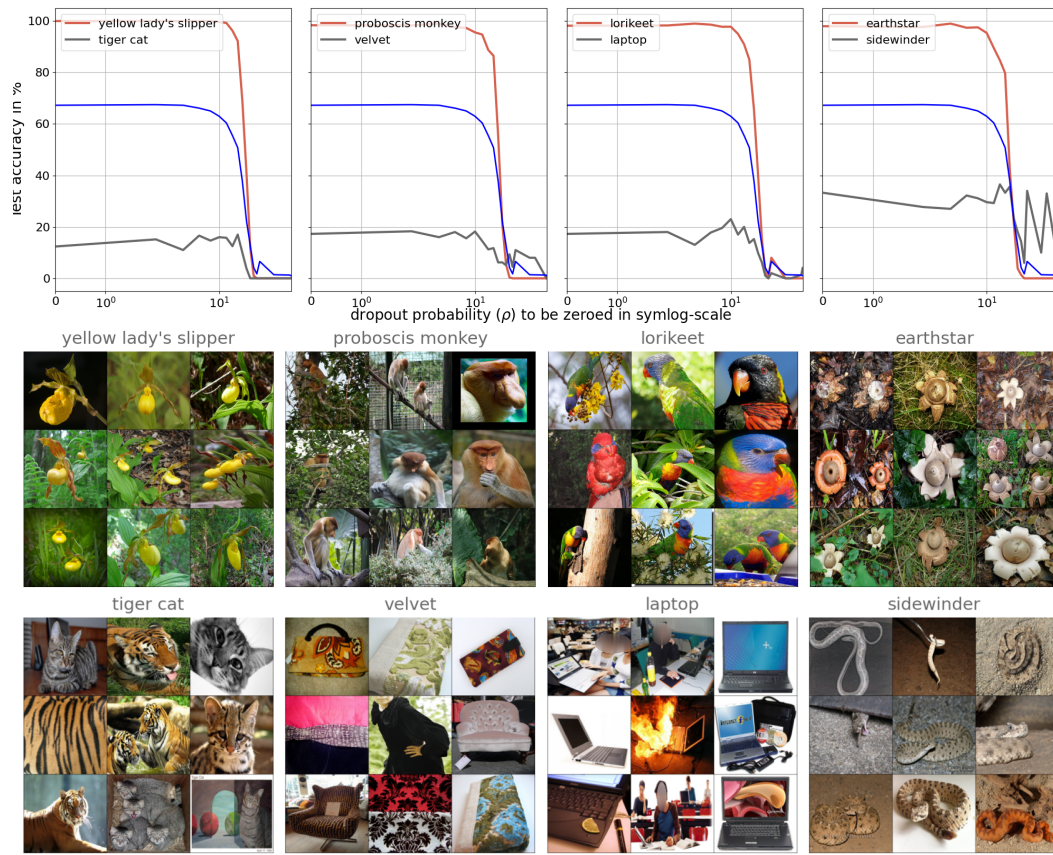

Figure 9: Reproduction of Figs. 12 and 13 but now with dropout (1d) with the best performing classes on the middle row and the worst performing classes one the bottom row.

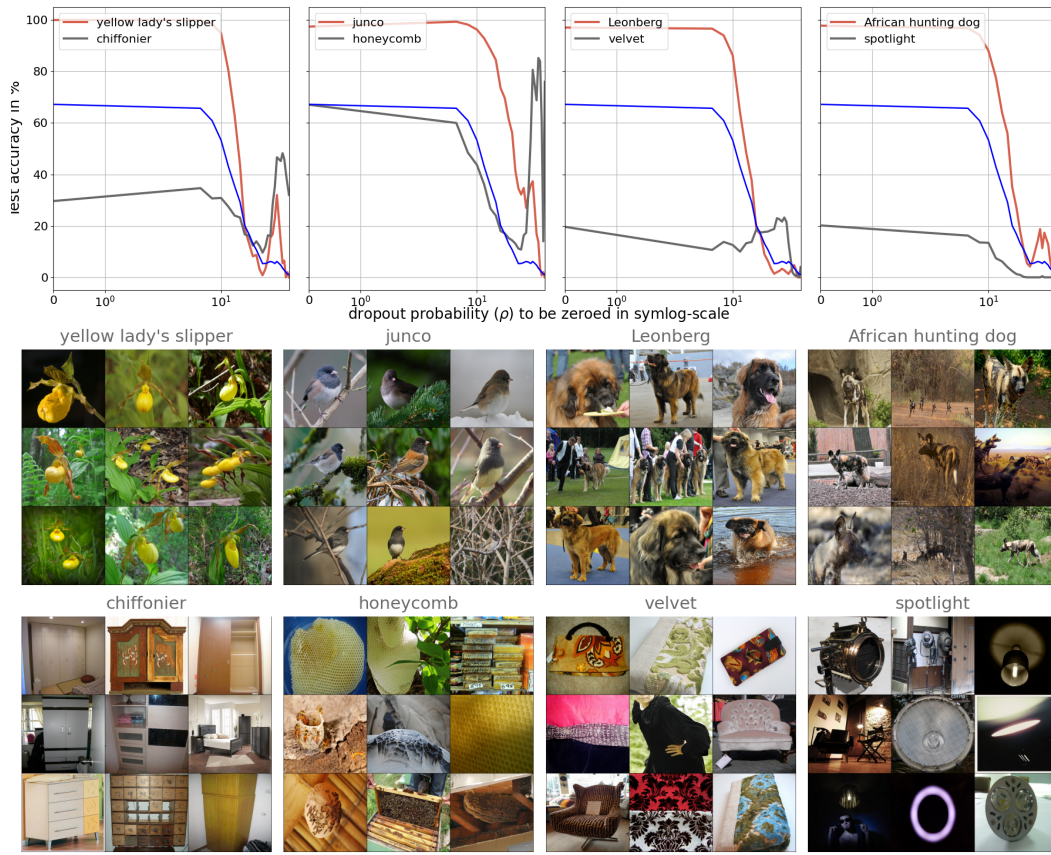

Figure 10: Reproduction of Figs. 12 and 13 but now with dropout (2d) with the best performing classes on the middle row and the worst performing classes one the bottom row.

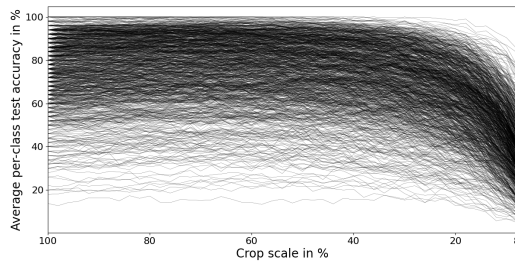

Figure 11: Per-class accuracy evolution when the proportion of the image being cropped ( $\theta$ ) is progressively increased from 8 to 100. While the overall trends mostly applies across classes, some extreme cases can present different sensitivity to aggressive cropping, leading to some classes being more successful as being label-preserved after application of the cropping. The weighted average of those lines (based on the proportion of samples coming from each class) gives back Fig. 5).



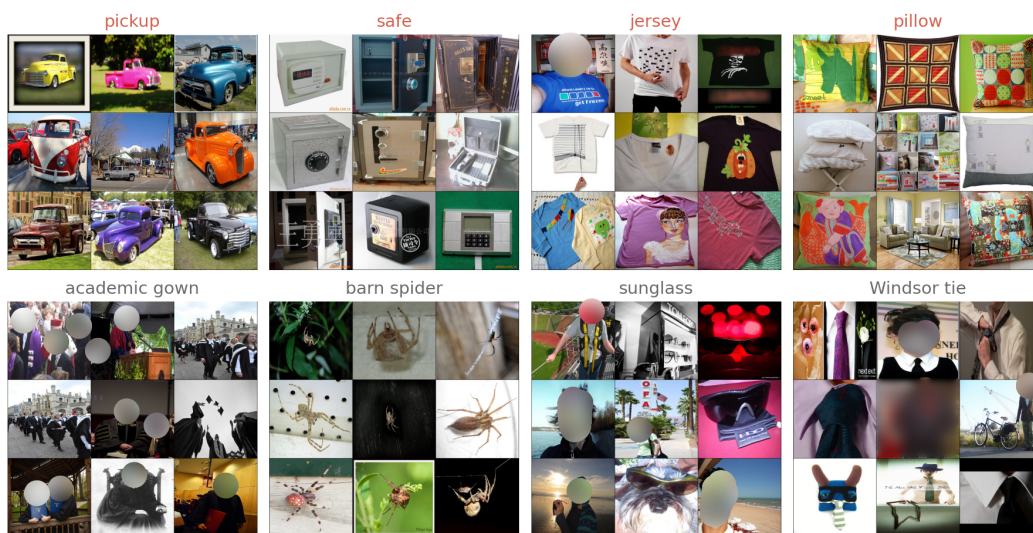

Figure 12: Random samples from the validation set of Imagenet that correspond to Fig. 2.

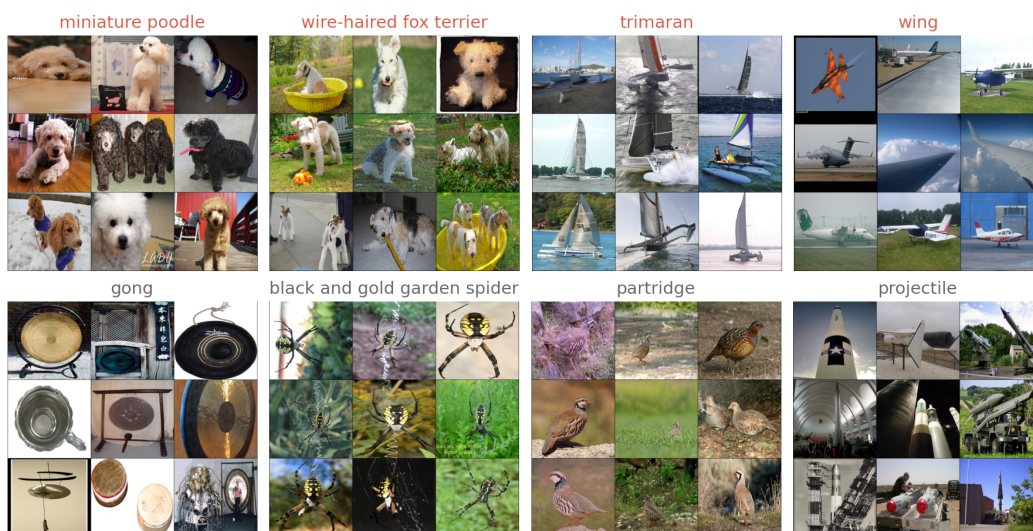

Figure 13: Random samples from the validation set of Imagenet that correspond to Fig. 3.



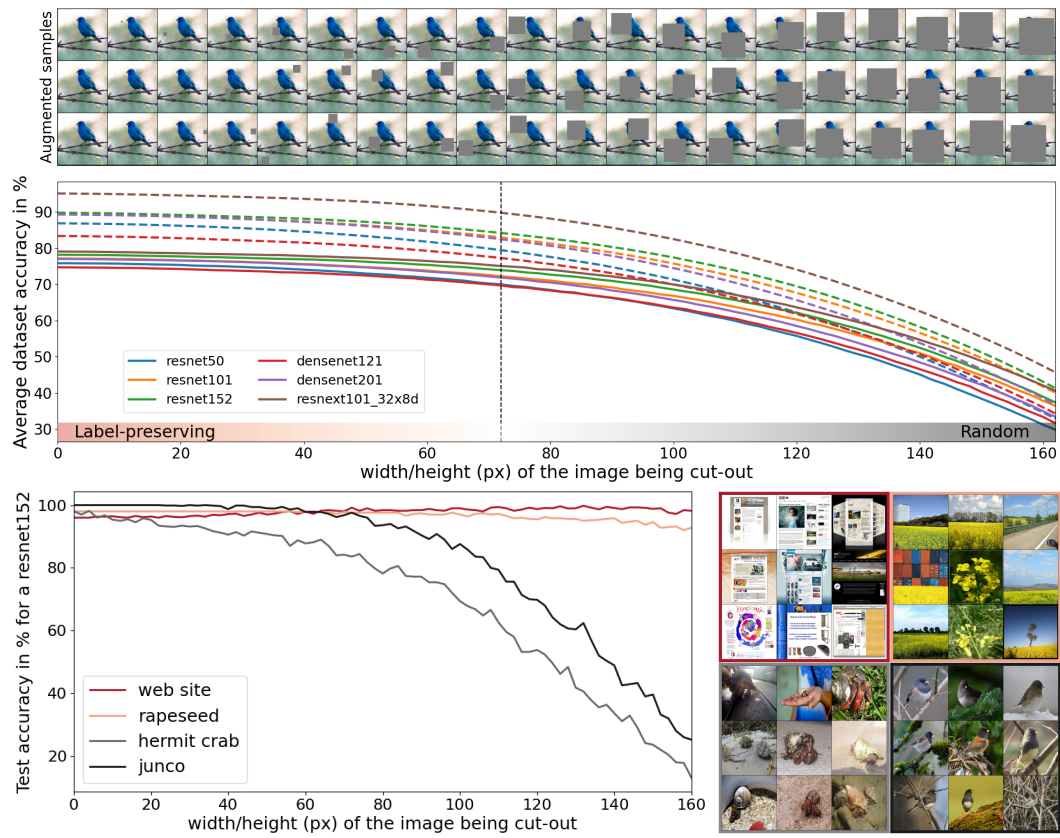

Figure 14: Reprise of Fig. 5 but using color jittering DA. The same conclusions are reached, different classes have different label-preserving regimes under this DA.

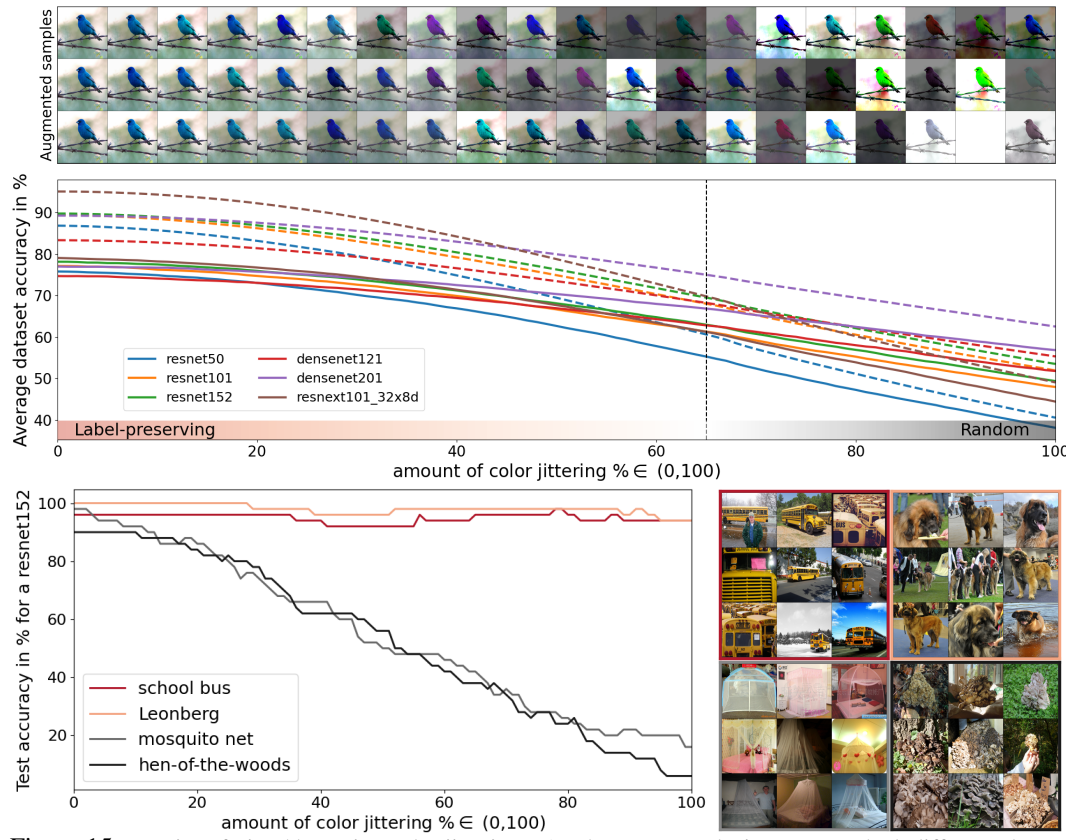

Figure 15: Reprise of Fig. 5 but using color jittering DA. The same conclusions are reached, different classes have different label-preserving regimes under this DA.

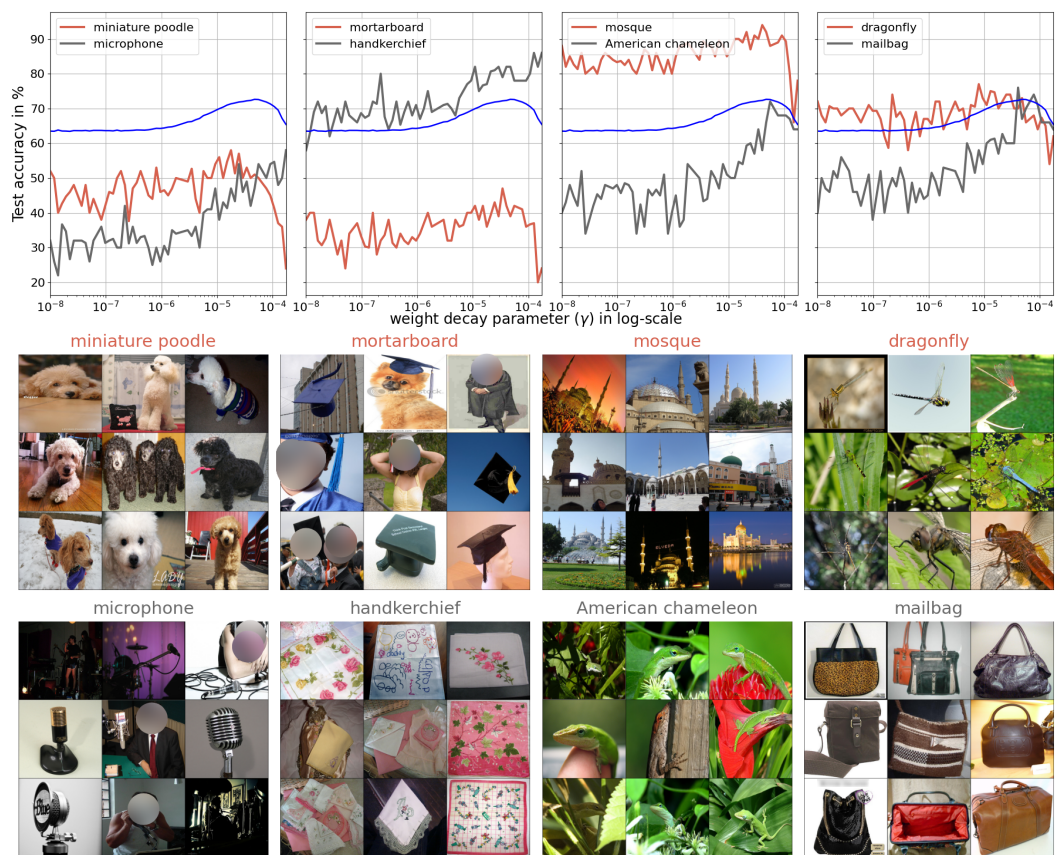

Figure 16: All results in this figure employ official model implementations from PyTorch that we have trained on Imagenet with varying weight decay parameter. Reprise of Fig. 3 but now with a different architecture (DenseNet121) instead of the ResNet50.

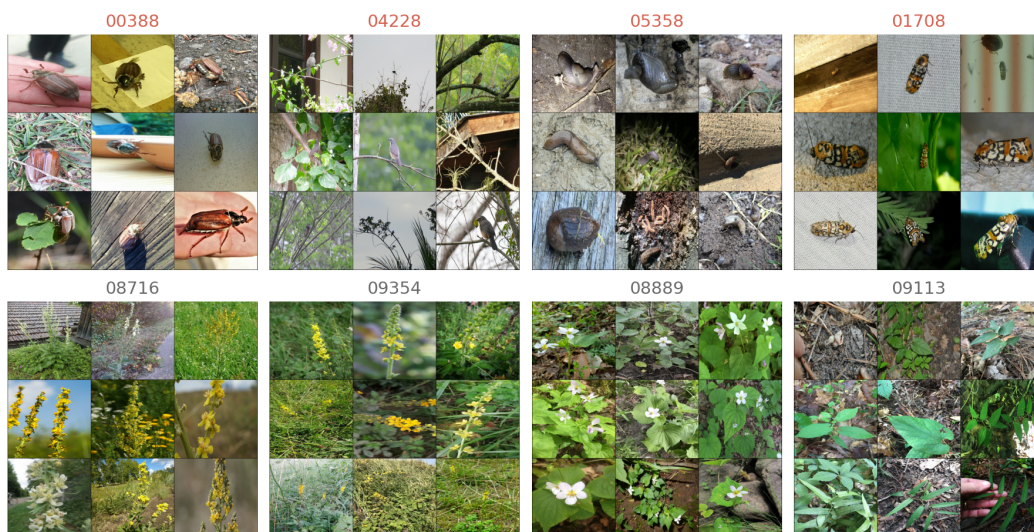

Figure 17: Random samples from the mini training set of INaturalist that correspond to Fig. 4
